# Supplementary material for: Acid ceramidase and its inhibitors: a de novo drug target and a new class of drugs for killing glioblastoma cancer stem cells with high efficiency
Source: PubMed Central journal article supplement (PMC5762539; doi:10.18632/oncotarget.22637), 2017-11-07
Supplement: oncotarget-08-112662-s001.pdf [file oncotarget-08-112662-s001.pdf]

## Acid ceramidase and its inhibitors: a *de novo* drug target and a new class of drugs for killing glioblastoma cancer stem cells with high efficiency

### SUPPLEMENTARY MATERIALS

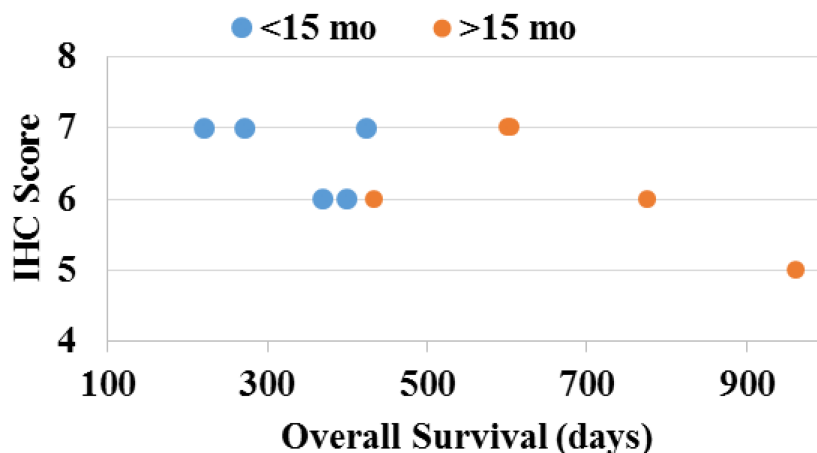

**Supplementary Figure 1: Scatter plot of IHC scores vs Overall Survival in days for the nine newly diagnosed GBM patient samples stained for ASAH1.** The lower IHC scores indicate longer survival, in general. The few discrepancies are possibly due to intra-tumoral heterogeneity of GBM.

**Supplementary Table 1: The list of 601 biomarkers and their coefficient of determination ( $R^2$ ) obtained from linear regression plots between mass spectral counts vs overall survival. See Supplementary\_Table\_1**

**Supplementary Table 2: Clinical characteristics of study subjects**

| <b>Patient ID/Lane</b> | <b>Age (years)</b> | <b>Sex</b> | <b>Overall Survival (days)</b> |
|------------------------|--------------------|------------|--------------------------------|
| 1                      | 25                 | Female     | 2754                           |
| 2                      | 47                 | Male       | 1385                           |
| 3                      | 65                 | Female     | 1071                           |
| 4                      | 52                 | Male       | 950                            |
| 5                      | 48                 | Male       | 614                            |
| 6                      | 39                 | Male       | 605                            |
| 7                      | 58                 | Male       | 533                            |
| 8                      | 66                 | Female     | 315                            |
| 9                      | 66                 | Female     | 291                            |
| 10                     | 64                 | Female     | 277                            |
| 11                     | 67                 | Female     | 181                            |
| 12                     | 51                 | Male       | 157                            |
| 13                     | 53                 | Female     | 105                            |
| 14                     | 65                 | Male       | 94                             |
| 15                     | 53                 | Male       | 38                             |
